# Supplementary material for: Combined Enhanced Biological Phosphorus Removal (EBPR) and Nitrite Accumulation for Treating High-strength Wastewater
Source: bioRxiv or medRxiv preprint supplement (doi:10.1101/2021.01.16.426983), 2021-01-19
Supplement: Supplementary file [file media-1.pdf]

## Supplementary Information

### **Combined Enhanced Biological Phosphorus Removal (EBPR) and Nitrite Accumulation for Treating High-strength Wastewater**

Zhihang Yuan <sup>a, 1</sup>, Da Kang <sup>a, b, 1</sup>, Guangyu Li <sup>c</sup>, Jangho Lee <sup>a</sup>, IL Han <sup>a</sup>, Dongqi Wang <sup>d</sup>, Ping Zheng <sup>b</sup>, Matthew C. Reid <sup>a</sup>, April Z. Gu <sup>a, \*</sup>

<sup>a</sup> *School of Civil and Environmental Engineering, Cornell University, United States*

<sup>b</sup> *Department of Environmental Engineering, College of Environmental & Resource Sciences, Zhejiang University, China*

<sup>c</sup> *Department of Civil and Environmental Engineering, Northeastern University, United States*

<sup>d</sup> *State Key Laboratory of Eco-hydraulics in Northwest Arid Region, Xi'an University of Technology, China*

<sup>1</sup> These authors contributed equally to this work.

\* Corresponding author: April Z. Gu

Civil and Environmental Engineering, Cornell University

E-mail address: [aprilgu@cornell.edu](mailto:aprilgu@cornell.edu)

## Methodology

### Oligotyping with 16S amplicon sequencing data

Oligotyping was carried out to further resolve *Candidatus Accumulibacter* genus OTUs into sub-genotypes, namely oligotypes, based on the high-variational sites in reconstructed 16S sequences [1], following the protocol in a previous study [2]. Briefly, five 16S gene V4 region amplicon sequencing datasets (day 32, 61, 111, 144, 158) were analyzed in mothur 1.43.0 [3]. Contigs were aligned to Silva v138 database [4] and classified by MiDAS 3.7 [5], a 16S rRNA database curated specifically for wastewater systems. Only the sequences classified as *Candidatus Accumulibacter* genus were extracted

(script: <https://github.com/DenefLab/MicrobeMiseq/tree/master/mothur2oligo>).

Oligotypes were then curated by resolving the sites with high entropy (Fig. S1), then manually refined until each oligotype contains no high entropy ( $\geq 0.2$ ) positions. Five minor oligotypes with less than 41 total read counts were discarded (Fig. S2). The relative abundances of each oligotype were estimated based on read counts. In total 3 oligotypes were identified from the *Candidatus Accumulibacter* genus.

Oligotype 1: CGTTGTGGTCCAAT;

Oligotype 2: CGTTGTGATCCAAT;

Oligotype 3: CGTTGGGGCCAAT.

### **Phylogenetic tree construction**

To reveal the phylogeny of identified *Candidatus Accumulibacter* oligotypes, a phylogenetic analysis was conducted on all identified oligotype representative sequences (3 total), *Candidatus Accumulibacter* oligotypes in a previous study [2] (9 total) and *Candidatus Accumulibacter phosphatis* reference sequences in the MiDAS database [5] (18 total). An extra random sequence (*Dechloromonas*, FLASV96.1460) in the same *Rhodocyclaceae* family was chosen from the MiDAS database as outgroup. Sequences were aligned using MAFFT v7.429 [6]. The phylogenetic tree was then searched using RAxML 8.2.12 [7] and visualized using online tool (<https://itol.embl.de/>).

### Calculation for nitrogen mass balance for one reactor cycle

$$TN_{in} = TN_{eff} + TN_{deni} + TN_{growth}$$

Where:

$TN_{in}$  is the influent TN concentration (mg N/L);

$TN_{eff}$  is the effluent TN concentration (mg N/L);

$TN_{deni}$  is the nitrogen concentration being removed via denitrification (mg N/L);

$TN_{growth}$  is the nitrogen concentration being used for cell growth (mg N/L).

Take the batch cycle on day 132 as an example:

$$TN_{in} = 33.12 \text{ mg N/L}; TN_{eff} = 7.02 \text{ mg N/L}; TN_{deni} = 7.90 \text{ mg N/L}.$$

As for  $TN_{growth}$ , everyday 400 ml mixed liquor was wasted and based on the measurement, MLSS and MLVSS were kept constant (MLVSS is ~4400 mg/L). Since there were 3 cycles per day, per each cycle 400/3 ml mixed liquor was wasted which means for each cycle  $400/3/1000 \text{ L} \times 4400 \text{ mg/L} = 586.67 \text{ mg biomass}$  was synthesized. The empirical cell biomass formula is  $C_5H_7O_2N$ .

$$\text{Therefore, } TN_{growth} = (586.67 \text{ mg biomass} \times 14/113)/4L = 18.17 \text{ mg N/L}.$$

$$\text{In this case, } TN_{eff} + TN_{deni} + TN_{growth} = 7.02 + 7.90 + 18.17 = 33.09 = TN_{in}.$$

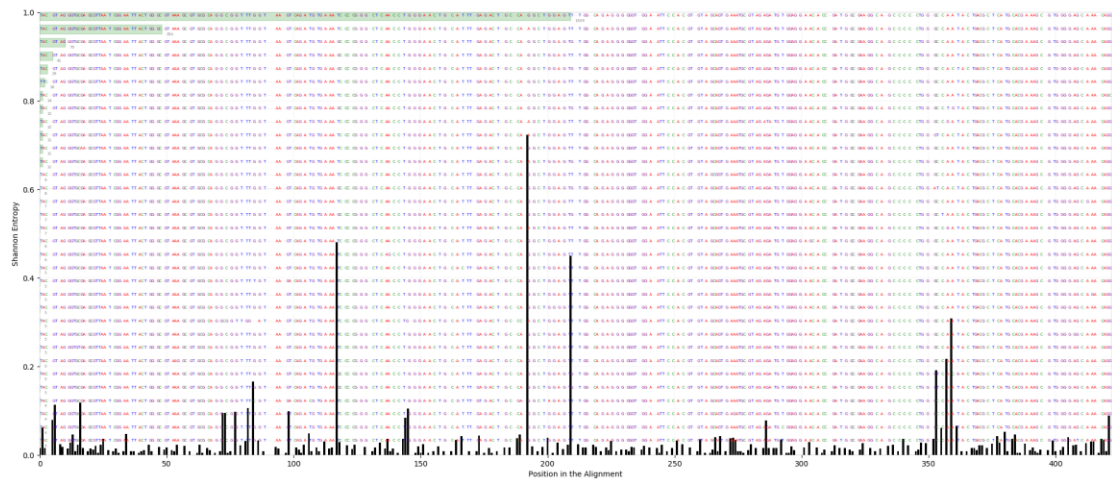

**Fig. S1** Entropy per position calculated in the multiple sequence alignment (MSA) of *Candidatus Accumulibacter* 16S rRNA amplicon sequencing contigs. Higher entropy indicates positions with higher base-type (A, C, G, T, or gap) variations. These positions were used to resolve *Candidatus Accumulibacter* genus OTUs into oligotypes.

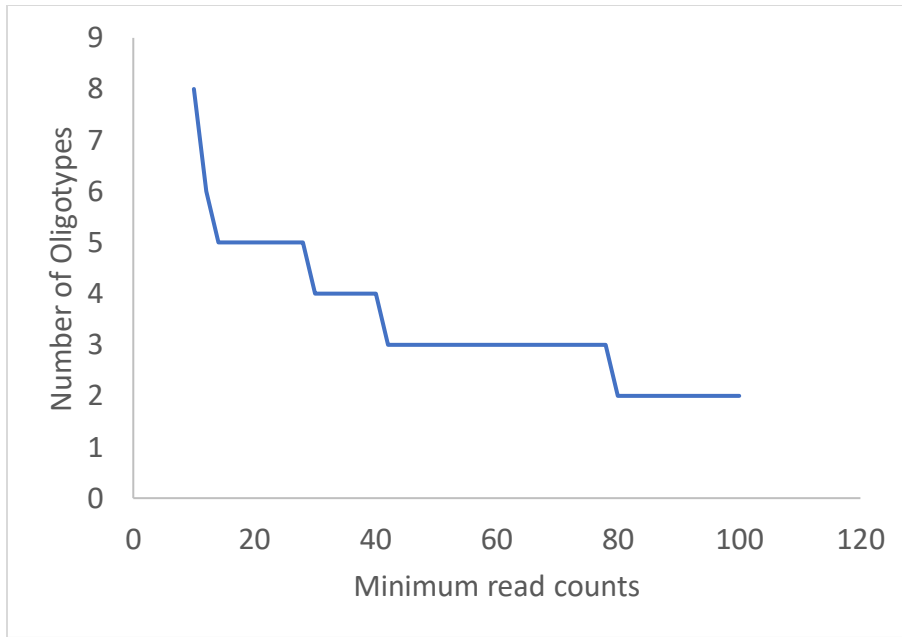

**Fig. S2** Number of oligotypes identified versus minimum total read counts (across all samples) chosen. The initial fast drop of oligotype number (10-40) indicated a large number of minor oligotypes with very low abundances which were considered as noise oligotypes and discarded. The minimal read count parameter was decided to be 41.

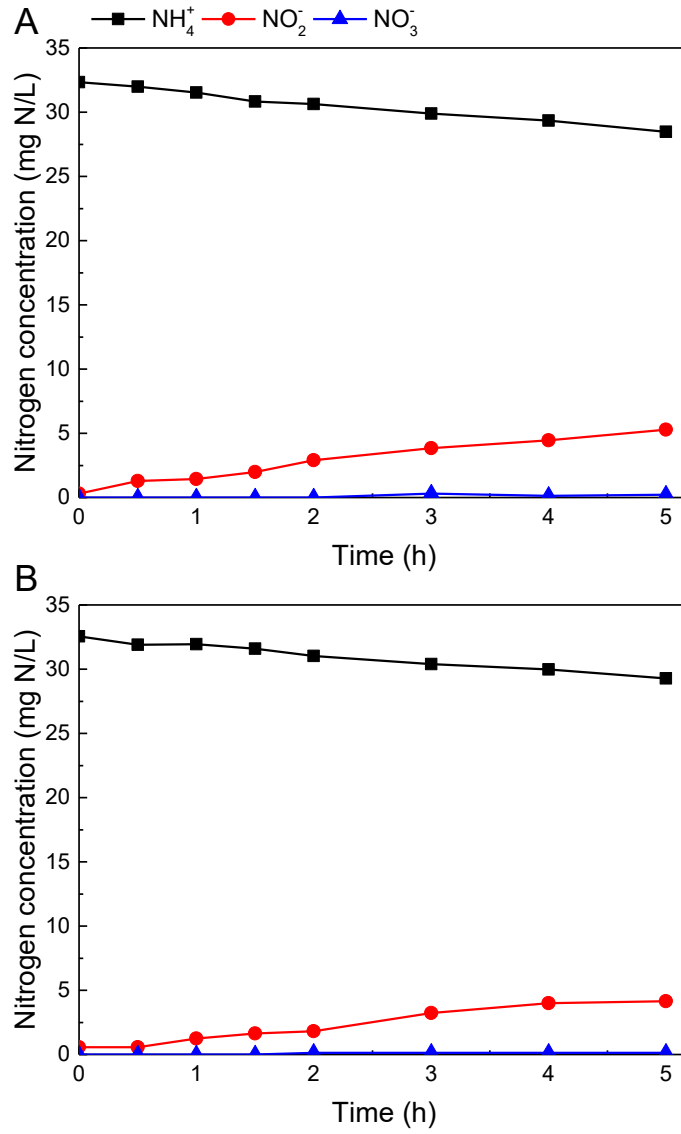

**Fig. S3** Nitrification batch activity test at S2 on day 116.

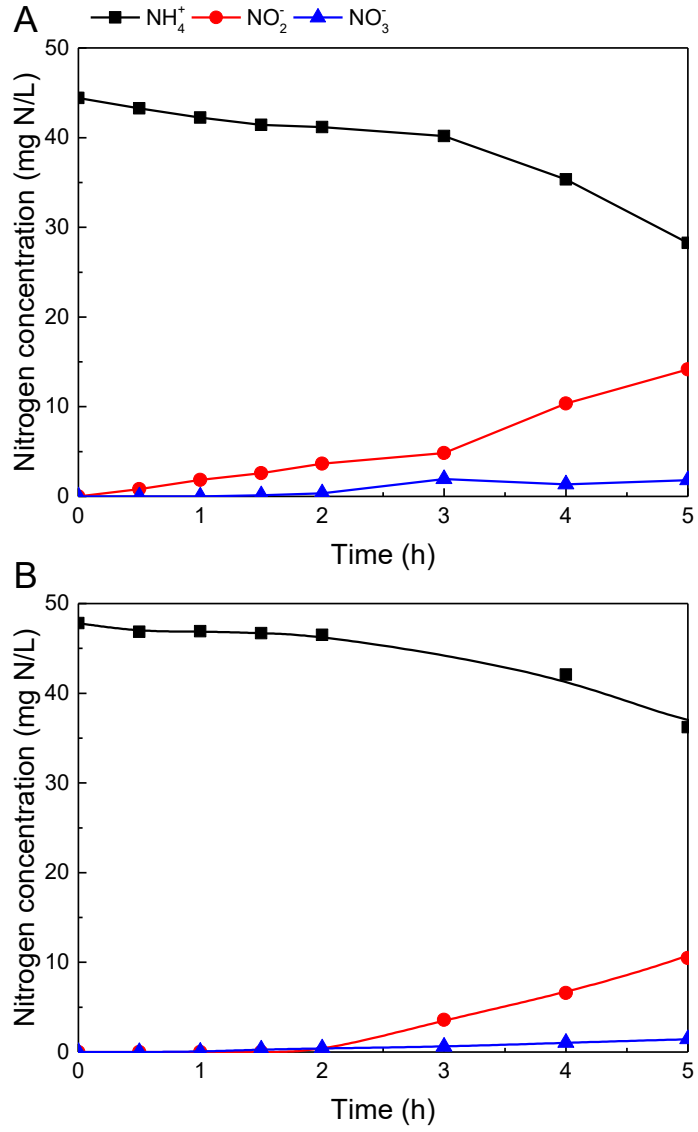

**Fig. S4** Nitrification batch activity test at S3 on day 153.



## References

- [1] Eren, A. M., Maignien, L., Sul, W. J., Murphy, L. G., Grim, S. L., Morrison, H. G., & Sogin, M. L. (2013). Oligotyping: differentiating between closely related microbial taxa using 16S rRNA gene data. *Methods in ecology and evolution*, 4(12), 1111-1119.
- [2] Srinivasan, V. N., Li, G., Wang, D., Tooker, N. B., Dai, Z., Onnis-Hayden, A., ... & Gu, A. Z. (2019). Oligotyping and Genome-Resolved Metagenomics Reveal Distinct Candidatus *Accumulibacter* Communities in Full-Scale Side-Stream versus Conventional Enhanced Biological Phosphorus Removal (EBPR) Configurations. *bioRxiv*, 596692.
- [3] Schloss, P. D., Westcott, S. L., Ryabin, T., Hall, J. R., Hartmann, M., Hollister, E. B., ... & Sahl, J. W. (2009). Introducing mothur: open-source, platform-independent, community-supported software for describing and comparing microbial communities. *Applied and environmental microbiology*, 75(23), 7537-7541.
- [4] Quast, C., Pruesse, E., Yilmaz, P., Gerken, J., Schweer, T., Yarza, P., ... & Glöckner, F. O. (2012). The SILVA ribosomal RNA gene database project: improved data processing and web-based tools. *Nucleic acids research*, 41(D1), D590-D596.
- [5] McIlroy, S. J., Saunders, A. M., Albertsen, M., Nierychlo, M., McIlroy, B., Hansen, A. A., ... & Nielsen, P. H. (2015). MiDAS: the field guide to the microbes of activated sludge. *Database*, 2015.
- [6] Katoh, K., Misawa, K., Kuma, K. I., & Miyata, T. (2002). MAFFT: a novel method for rapid multiple sequence alignment based on fast Fourier transform. *Nucleic acids research*, 30(14), 3059-3066.
- [7] Stamatakis, A. (2014). RAxML version 8: a tool for phylogenetic analysis and post-analysis of large phylogenies. *Bioinformatics*, 30(9), 1312-1313.
